# Supplementary material
Source: PubMed Central journal article supplement (PMC8115221)

Source Data Fig. 4

Fig. 4d

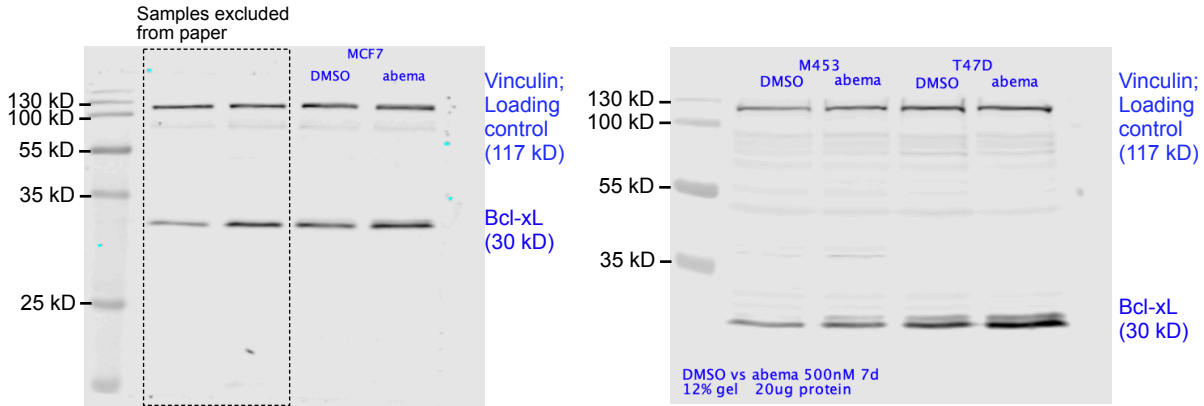

Fig. 4g

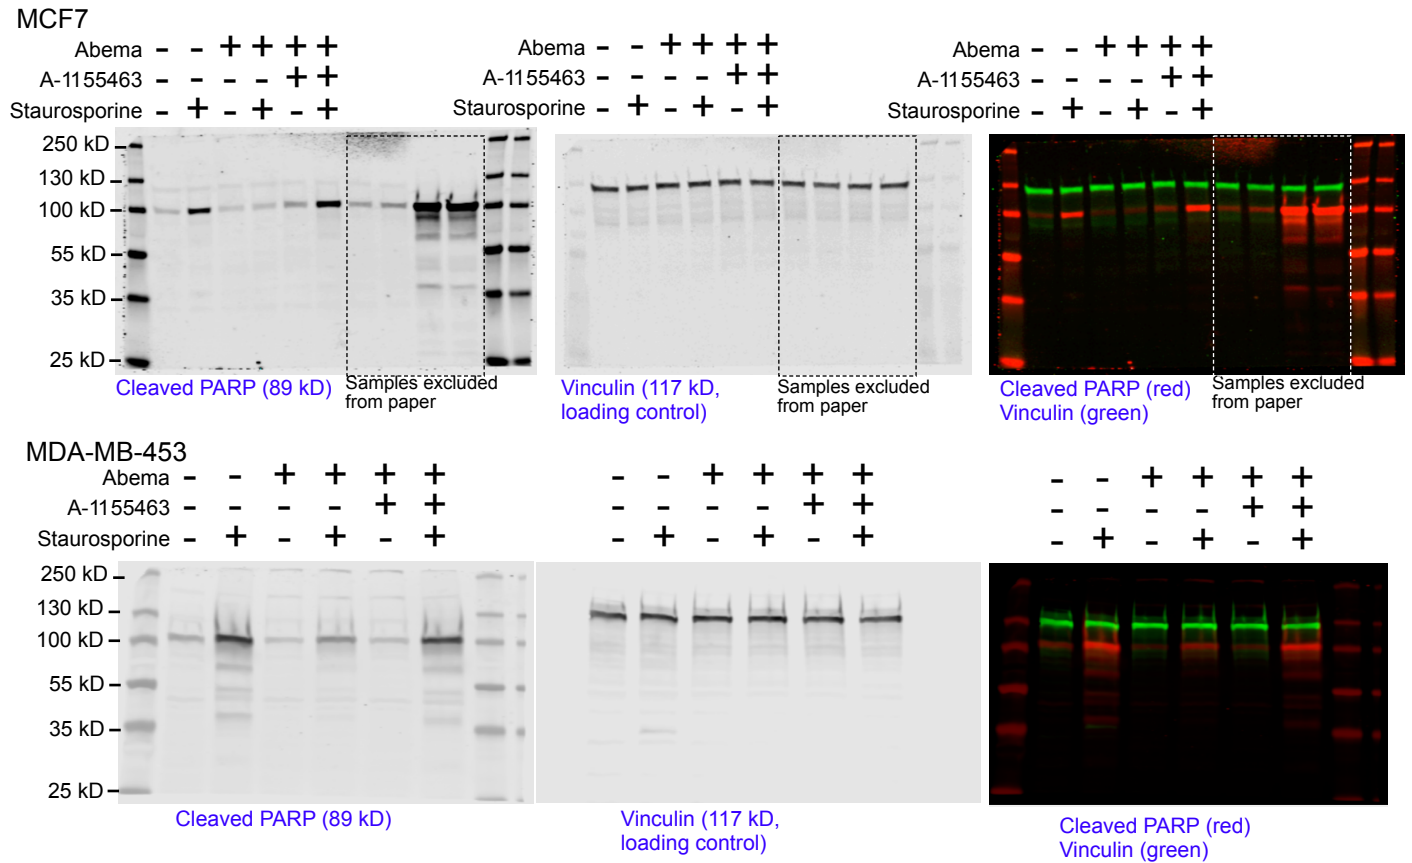

Supplement: NIHMS1696343-supplement-Unprocesse96343_SourceDataFig4_d_Western_Blot_images.pdf [file NIHMS1696343-supplement-Unprocesse96343_SourceDataFig4_d_Western_Blot_images.pdf]
